# Supplementary material
Source: ML conference proceedings conference paper supplement (https://proceedings.mlr.press/v89/imaizumi19a.html)
Supplement: Supplementary file [file imaizumi19a-supp.pdf]

# Supplementary materials for “Deep Neural Networks Learn Non-Smooth Functions Effectively.”

## A Additional definitions

### The Hölder Space

Let  $\Omega$  be an open subset of  $\mathbb{R}^D$  and  $\beta > 0$  a constant. The Hölder space  $H^\beta(\bar{\Omega})$ , where  $\bar{\Omega}$  is the closure of  $\Omega$ , is the set of functions  $f : \bar{\Omega} \rightarrow \mathbb{R}$  such that  $f$  is continuously differentiable on  $\bar{\Omega}$  up to the order  $[\beta]$ , and the  $[\beta]$ -th derivatives of  $f$  are Hölder continuous with exponent  $\beta - [\beta]$ , namely,

$$\sup_{x, x' \in \bar{\Omega}, x \neq x'} \frac{|\partial^a f(x) - \partial^a f(x')|}{|x - x'|^{\beta - [\beta]}} < \infty$$

for any multi-index  $a$  with  $|a| = [\beta]$ , where  $\partial^a$  denotes a partial derivative.. The norm of the Hölder space is defined by

$$\|f\|_{H^\beta} := \max_{|a| \leq [\beta]} \sup_{x \in \bar{\Omega}} |\partial^a f(x)| + \max_{|a| = [\beta]} \sup_{x, x' \in \bar{\Omega}, x \neq x'} \frac{|\partial^a f(x) - \partial^a f(x')|}{|x - x'|^{\beta - [\beta]}}.$$

### Basis Pieces defined by Continuous Embeddings

We redefine a piece as an intersection of  $J$  embeddings of  $D$ -dimensional balls. we first introduce an extended notion of a *boundary fragment class* which is developed by [Dudley \(1974\)](#) and [Mammen et al. \(1999\)](#).

Preliminarily, let  $\mathbb{S}^{D-1} := \{x \in \mathbb{R}^D : \|x\|_2 = 1\}$  is the  $D - 1$  dimensional sphere, and let  $(V_j, F_j)_{j=1}^\ell$  be its coordinate system as a  $C^\infty$ -differentiable manifold such that  $F_j : V_j \rightarrow \mathring{B}^{D-1} := \{x \in \mathbb{R}^{D-1} \mid \|x\| < 1\}$  is a diffeomorphism. A function  $g : \mathbb{S}^{D-1} \rightarrow \mathbb{R}$  is said to be in the Hölder class  $H^\alpha(\mathbb{S}^{D-1})$  with  $\alpha > 0$  if  $g \circ F_j^{-1}$  is in  $H^\alpha(\mathring{B})$ .

Let  $B^D = \{x \in \mathbb{R}^D \mid \|x\| \leq 1\}$ . A subset  $R \subset I^D$  is called a *basic piece* if it satisfies two conditions: (i) there is a continuous embedding  $g : B^D \rightarrow \mathbb{R}^D$  such that its restriction to the boundary  $\mathbb{S}^{D-1}$  is in  $H^\alpha(\mathbb{S}^{D-1})$  and  $R = I^D \cap \text{Image}(g)$ , (ii) there is  $1 \leq i \leq D$  and  $h \in H^\alpha(I^{D-1})$  such that the indicator function of  $R$  is given by the graph

$$1_R = \Psi_d(x_1, \dots, x_{i-1}, x_i + h(x_1, \dots, \check{x}_i, \dots, x_D), x_{i+1}, \dots, x_D),$$

where  $\Psi$  is the Heaviside function. The condition (i) tells that a basic piece belongs to the *boundary fragment class* which is developed by [Dudley \(1974\)](#) and [Mammen et al. \(1999\)](#), while (ii) means  $R$  is a set defined by a horizon function discussed in [Petersen and Voigtlaender \(2018\)](#).

## B Proof of Theorem [1](#)

We first provide additional notations.  $\lambda$  denotes the Lebesgue measure. For a function  $f : I^D \rightarrow \mathbb{R}$ ,  $\|f\|_{L^\infty} = \sup_{x \in I^D} |f(x)|$  is a supremum norm.  $\|f\|_{L^2} := \|f\|_{L^2(I^D; \lambda)}$  is an abbreviation for  $L^2(I^D; \lambda)$ -norm.

Given a set of observations  $\{X_1, \dots, X_n\}$ , let  $\|\cdot\|_n$  be an empirical norm defined by

$$\|f\|_n^2 = n^{-1} \sum_{i=1}^n f(X_i)^2.$$

The empirical norm of a random variable is also defined by

$$\|Y\|_n := \left( n^{-1} \sum_{i \in [n]} Y_i^2 \right)^{1/2} \quad \text{and} \quad \|\xi\|_n := \left( n^{-1} \sum_{i \in [n]} \xi_i^2 \right)^{1/2}.$$

The empirical norms are in fact seminorms, which do not satisfy the strong positivity.

Let  $\mathcal{F}$  be a vector space with a norm  $\|\cdot\|$ . For  $\epsilon > 0$ , the covering number of  $\mathcal{F}$  with  $\|\cdot\|$  for radius  $\delta$  is defined by

$$\mathcal{N}(\epsilon, \mathcal{F}, \|\cdot\|) := \inf \left\{ N \mid \text{there is } \{f_j\}_{j \in [N]} \subset \mathcal{F} \text{ such that } \|f - f_j\| \leq \epsilon, \forall f \in \mathcal{F} \right\}.$$

By the definition of the least square estimator (2), we obtain the following basic inequality

$$\|Y - \hat{f}^L\|_n^2 \leq \|Y - f\|_n^2$$

for all  $f \in \Xi_{NN,\eta}(S, B, L)$ . It follows from  $Y_i = f^*(X_i) + \xi_i$  that

$$\|f^* + \xi - \hat{f}^L\|_n^2 \leq \|f^* + \xi - f\|_n^2.$$

A simple calculation yields

$$\|f^* - \hat{f}^L\|_n^2 \leq \|f^* - f\|_n^2 + \frac{2}{n} \sum_{i=1}^n \xi_i (\hat{f}^L(X_i) - f(X_i)). \quad (7)$$

In the following, we will fix  $f \in \Xi_{NN,\eta}(S, B, L)$  and evaluate each of the three terms in the RHS of (7). In the first subsection, we provide a result for approximating  $f^* \in \mathcal{F}_{M,J,\alpha,\beta}$  by DNNs. In the second subsection, we evaluate the variance of  $\hat{f}^L$ . In the last subsection, we combine the results and derive an overall rate.

### B.1 Approximate piecewise functions by DNNs

The purpose of this part is to bound the following error

$$\|f - f^*\|_{L^2(P_X)}$$

for properly selected  $f \in \Xi_{NN,\eta}(S, B, L)$ . To this end, we consider an existing  $\Theta$  with properly selected  $S, B$  and  $L$ . Our proof is obtained by extending techniques by Yarotsky (2017) and Petersen and Voigtlaender (2018).

Fix  $f^* \in \mathcal{F}_{M,J,\alpha,\beta}$  such that  $f^* = \sum_{m \in [M]} f_m^* \mathbf{1}_{R_m^*}$  with  $f_m^* \in H^\beta$  and  $R_m^* \in \mathcal{R}_{\alpha,J}$  for  $m \in [M]$ . To approximate  $f^*$ , we introduce neural networks  $\Theta_{f,m}$  and  $\Theta_{r,m}$  for each  $m \in [M]$ , where the number of layers  $L$  and non-zero parameters  $S$  will be specified later.

For approximation, we introduce some specific architectures of DNNs as building blocks. The DNN  $\Theta_+ := (A, b) = ((1, \dots, 1)^\top, 0)$  works as *summation*:  $G_\eta[\Theta_+](x_1, \dots, x_D) = \sum_{d \in [D]} x_d$ , and the DNN  $\Theta_\times$  plays a role for *multiplication*:  $G_\eta[\Theta_\times](x_1, \dots, x_D) \approx \prod_{d \in [D]} x_d$ . A network  $\Theta_3$  approximates the inner product, i.e.,  $G_\eta[\Theta_3](x_1, \dots, x_M, x'_1, \dots, x'_M) \approx \sum_{m \in [M]} x_m x'_m$ . The existence and their approximation errors of  $G_\eta[\Theta_\times]$  and  $G_\eta[\Theta_3]$  will be shown in Lemma 1 and 2.

We construct a network given by  $G_\eta[\Theta_3](G_\eta[\Theta_{f,1}](\cdot), G_\eta[\Theta_{f,2}](\cdot), \dots, G_\eta[\Theta_{f,M}](\cdot), G_\eta[\Theta_{r,1}](\cdot), \dots, G_\eta[\Theta_{r,M}](\cdot))$ , where  $\Theta_{f,1}$  and  $\Theta_{r,1}$  consist of  $M$ -dimensional outputs  $(\Theta_{f,1}, \dots, \Theta_{f,M})$  and  $(\Theta_{r,1}, \dots, \Theta_{r,M})$ , respectively. We evaluate the distance between  $f^*$  and the combined neural network :

$$\begin{aligned} & \|f^* - G_\eta[\Theta_3](G_\eta[\Theta_{f,1}](\cdot), \dots, G_\eta[\Theta_{f,M}](\cdot), G_\eta[\Theta_{r,1}](\cdot), \dots, G_\eta[\Theta_{r,M}](\cdot))\|_{L^2} \\ &= \left\| \sum_{m \in [M]} f_m^* \mathbf{1}_{R_m^*} - G_\eta[\Theta_3](G_\eta[\Theta_{f,1}](\cdot), \dots, G_\eta[\Theta_{f,M}](\cdot), G_\eta[\Theta_{r,1}](\cdot), \dots, G_\eta[\Theta_{r,M}](\cdot)) \right\|_{L^2} \\ &\leq \left\| \sum_{m \in [M]} f_m^* \otimes \mathbf{1}_{R_m^*} - \sum_{m \in [M]} G_\eta[\Theta_{f,m}] \otimes G_\eta[\Theta_{r,m}] \right\|_{L^2} \\ &\quad + \left\| \sum_{m \in [M]} G_\eta[\Theta_{f,m}] \otimes G_\eta[\Theta_{r,m}] - G_\eta[\Theta_3](G_\eta[\Theta_{f,1}](\cdot), \dots, G_\eta[\Theta_{f,M}](\cdot), G_\eta[\Theta_{r,1}](\cdot), \dots, G_\eta[\Theta_{r,M}](\cdot)) \right\|_{L^2} \\ &\leq \sum_{m \in [M]} \|f_m^* \otimes \mathbf{1}_{R_m^*} - G_\eta[\Theta_{f,m}] \otimes G_\eta[\Theta_{r,m}]\|_{L^2} \end{aligned}$$

$$\begin{aligned}
 & + \left\| \sum_{m \in [M]} G_\eta[\Theta_{f,m}] \otimes G_\eta[\Theta_{r,m}] - G_\eta[\Theta_3](G_\eta[\Theta_{f,1}] (\cdot), \dots, G_\eta[\Theta_{f,M}] (\cdot), G_\eta[\Theta_{r,1}] (\cdot), \dots, G_\eta[\Theta_{r,M}] (\cdot)) \right\|_{L^2} \\
 & \leq \sum_{m \in [M]} \|(f_m^* - G_\eta[\Theta_{f,m}]) \otimes G_\eta[\Theta_{r,m}]\|_{L^2} + \sum_{m \in [M]} \|f_m^* \otimes (\mathbf{1}_{R_m^*} - G_\eta[\Theta_{r,m}])\|_{L^2} \\
 & + \left\| \sum_{m \in [M]} G_\eta[\Theta_{f,m}] \otimes G_\eta[\Theta_{r,m}] - G_\eta[\Theta_3](G_\eta[\Theta_{f,1}] (\cdot), \dots, G_\eta[\Theta_{f,M}] (\cdot), G_\eta[\Theta_{r,1}] (\cdot), \dots, G_\eta[\Theta_{r,M}] (\cdot)) \right\|_{L^2} \\
 & =: \sum_{m \in [M]} B_{1,m} + \sum_{m \in [M]} B_{2,m} + B_3. \tag{8}
 \end{aligned}$$

We will bound  $B_{m,1}, B_{m,2}$  for  $m \in [M]$  and  $B_3$ .

**Bound of  $B_{1,m}$ .** The Hölder inequality gives

$$\|(f_m^* - G_\eta[\Theta_{f,m}]) \otimes \mathbf{1}_{R_m^*}\|_{L^2} \leq \|f_m^* - G_\eta[\Theta_{f,m}]\|_{L^2} \|G_\eta[\Theta_{r,m}]\|_{L^\infty}.$$

Theorem 1 in Yarotsky (2017) and Theorem A.9 in Petersen and Voigtlaender (2018) guarantee that there exists a neural network  $\Theta_{f,m}$  such that  $\|\Theta_{f,m}\|_0 \leq c'_1(1 + \log_2[(1 + \beta) \cdot (1 + \beta/D)])$ ,  $\|\Theta_{f,m}\|_0 \leq C'_1 \epsilon^{-D/\beta}$ ,  $\|\Theta_{f,m}\|_\infty \leq \epsilon^{-2s_1}$ , and  $\|f_m^* - G_\eta[\Theta_{f,m}]\|_{L^2} < \epsilon$ , where  $c_1, c'_1, s_1 > 0$  are constants depending only on  $f^*$ . The neural network  $\Theta_{r,m}$  is given by Lemma 3.4 in Petersen and Voigtlaender (2018), for which  $\|G_\eta[\Theta_{r,m}]\|_{L^\infty} \leq 1$ . Combining these results, we obtain

$$B_{1,m} < \epsilon.$$

**Bound of  $B_{2,m}$ .** We have

$$\|f_m^* \otimes (\mathbf{1}_{R_m^*} - G_\eta[\Theta_{r,m}])\|_{L^2} \leq \|f_m^*\|_{L^\infty} \|\mathbf{1}_{R_m^*} - G_\eta[\Theta_{r,m}]\|_{L^2}.$$

From  $f_m^* \in H^\beta(I^D)$ , there exists a constant  $C_H > 0$  such that  $\|f_m^*\|_{L^2} \leq C_H$ .

Recall that each  $R_m^* \in \mathcal{R}_{\alpha,J}$  takes the form  $R_m^* = \cap_{j=1}^J R_m^j$  with  $R_m^j \in \mathcal{R}_{\alpha,1}$  for some  $B$ , and thus  $\mathbf{1}_{R_m^*} \in \mathcal{HF}_{\alpha,D,B}$  defined in Petersen and Voigtlaender (2018). Then, from Lemma 3.4 in Petersen and Voigtlaender (2018), there are some constants  $c', c$ , and  $s > 0$  depending on  $\alpha, D$ , and  $B$  such that for any  $\epsilon > 0$  a neural network  $\Theta_{m,j}$  can be found with

$$\|\mathbf{1}_{R_m^j} - G_\eta[\Theta_{m,j}]\|_{L^2} \leq \epsilon,$$

$\|\Theta_{m,j}\|_0 \leq c'_2(1 + \alpha/D) \log(2 + \alpha)$ ,  $\|\Theta_{m,j}\|_0 \leq c_2 \epsilon^{-2(D-1)/\alpha}$ , and  $\|\Theta_{m,j}\|_\infty \leq \epsilon^{-2s_2}$ . Note that  $c_2, c'_2, s_2$  depend only on  $f^*$  for our purpose.

Define a neural network  $\Theta_{r,m}$  by

$$G[\Theta_{r,m}] := G[\Theta_{\times,J}](G_\eta[\Theta_{m,1}] (\cdot), \dots, G_\eta[\Theta_{m,J}] (\cdot)),$$

where  $\Theta_{\times,J}$  is given in Lemma 1 below. It follows that

$$\begin{aligned}
 & \|\mathbf{1}_{R_m^*} - G_\eta[\Theta_{r,m}]\|_{L^2} \\
 & \leq \left\| \mathbf{1}_{R_m^*} - \bigotimes_{j \in [J]} G_\eta[\Theta_{m,j}] \right\|_{L^2} + \left\| \bigotimes_{j \in [J]} G_\eta[\Theta_{m,j}] - G_\eta[\Theta_{r,m}] \right\|_{L^2} \tag{9}
 \end{aligned}$$

The first term of the last line of (9) is bounded by

$$\begin{aligned}
 & \left\| \bigotimes_{j \in [J]} \mathbf{1}_{R_{m,j}} - \bigotimes_{j \in [J]} G_\eta[\Theta_{m,j}] \right\|_{L^2} \\
 & = \sum_{j \in [J]} \|\mathbf{1}_{R_{m,j}} - G_\eta[\Theta_{m,j}]\|_{L^2} \prod_{j'=1}^j \|\mathbf{1}_{R_{m,j'}}\|_{L^2} \prod_{j'' \in [J] \setminus [j]} \|G_\eta[\Theta_{m,j''}]\|_{L^2}
 \end{aligned}$$

$$\leq \sum_{j \in [J]} \|1_{R_{m,j}} - G_\eta[\Theta_{m,j}]\|_{L^2},$$

where  $\|G_\eta[\Theta_{r,m}]\|_\infty \leq 1$  is used in the last line. From Lemma 1, the second term of (9) is upper bounded by  $(J-1)\varepsilon$ . We finally obtain

$$B_{2,m} := \|f_m^* \otimes (\mathbf{1}_{R_m^*} - G_\eta[\Theta_{r,m}])\|_{L^2} \leq C_H(2J-1)\varepsilon.$$

**Lemma 1.** Fix  $\theta > 0$  arbitrary. There are absolute constants  $C_\times > 0$  and  $s_\times > 0$  such that for any  $\epsilon \in (0, 1/2)$ ,  $D' \in \mathbb{N}$  there exists a neural network  $\Theta_{\times, D'}$  of  $D'$ -dimensional input with at most  $(1 + \log_2 D')/\theta$  layers,  $\|\Theta_{\times, D'}\|_0 \leq C_\times D' \epsilon^{-\theta}$ ,  $\|\Theta'_2\|_\infty \leq \epsilon^{-2s}$ , and

$$\left\| \prod_{d \in [D']} x_d - G_\eta[\Theta_{\times, D'}](x_1, \dots, x_{D'}) \right\|_{L^\infty([-1, 1]^{D'})} \leq (D' - 1)\epsilon.$$

*Proof.* We employ the neural network for multiplication  $\Theta_{\times, D'}$  as Proposition 3 in Yarotsky (2017) and Lemma A.3 in Petersen and Voigtlaender (2018), and consider a tree-shaped multiplication network. There are  $D' - 1$  multiplication networks and the tree has  $1 + \log_2 D'$  depth.  $\square$

**Bound of  $B_3$ .** Take  $\Theta_3$  as the neural network in Lemma 2. Then we obtain

$$B_3 \leq M\epsilon.$$

**Lemma 2.** Let  $\theta > 0$  be arbitrary. Then, with the constants  $C_\times, s > 0$  in Lemma 1, for each  $\epsilon \in (0, 1/2)$  and  $D' \in \mathbb{N}$ , there exists a neural network  $\Theta_3$  for a  $2D'$ -dimensional input with at most  $1 + L$  layers where  $L > 1/\theta$  and  $D' + C_\times D' \epsilon^{-\theta}$  non-zero parameters such that  $\|\Theta_3\|_\infty \leq \epsilon^{-s}$  and

$$\left| G_\eta[\Theta_3](x_1, \dots, x_{D'}, x_{D'+1}, \dots, x_{2D'}) - \sum_{d \in [D']} x_d x_{D'+d} \right| \leq D'\epsilon.$$

*Proof.* Let  $\Theta_3$  be a neural network defined by

$$G_\eta[\Theta_3](x) = G_\eta[\Theta_+](G_\eta[\Theta_\times](x_1, x_{D'+1}), \dots, G_\eta[\Theta_\times](x_{D'}, x_{2D'})),$$

where  $\Theta_\times$  is given by Lemma 1, and  $\Theta_+$  is the summation network given by

$$\Theta_+ := (A, b) = ((1, \dots, 1)^\top, 0).$$

Then, we evaluate the difference as

$$\begin{aligned} \left| G_\eta[\Theta_3](x_1, \dots, x_{2D'}) - \sum_{d \in [D']} x_d x_{2d} \right| &= \left| \sum_{d \in [D']} G_\eta[\Theta_\times](x_d, x_{D'+d}) - \sum_{d \in [D']} x_d x_{D'+d} \right| \\ &\leq \sum_{d \in [D']} |G_\eta[\Theta_\times](x_d, x_{D'+d}) - x_d x_{D'+d}| \leq D'\epsilon, \end{aligned}$$

where the last inequality uses Lemma 1.  $\square$

**Combined bound** We combine the results about  $B_{1,m}, B_{2,m}$  and  $B_3$ , then define  $\dot{f} \in \Xi_{NN, \eta}(S, B, L)$  for approximating  $f^*$ .

For  $\Theta_1$

$$|\Theta_1| \leq c'_1(1 + \lceil \log_2(1 + \beta) \rceil) \cdot (1 + \beta/D), \quad |\Theta_1|_0 \leq M c_1 \varepsilon_1^{-D/\beta}, \quad \|\Theta_1\|_\infty \leq \varepsilon^{-2s_1}.$$

For  $\Theta_2$ ,

$$|\Theta_2| \leq c'_2(1 + \lceil \log_2(2 + \alpha) \rceil) \cdot (1 + \alpha/D) + \frac{1 + \log_2 J}{\theta_2}, \quad |\Theta_2|_0 \leq M J (c_2 \varepsilon_2^{-(2D-2)/\alpha} + c_\times \varepsilon_2^{-\theta_2}), \quad \|\Theta_2\|_\infty \leq \varepsilon^{-2s_2}.$$

For  $\Theta_3$ ,

$$|\Theta_3| \leq 1 + 1/\theta_3, \quad |\Theta_3|_0 \leq M + c_\times M \varepsilon^{-\theta_3}, \quad \|\Theta_3\|_\infty \leq \varepsilon_3^{-2s_3}.$$

To balance the approximation error and estimation error, the latter of which will be discussed later, we choose the  $\varepsilon_i$  ( $i = 1, 2, 3$ ) and  $\theta_i$  ( $i = 2, 3$ ) as follows:

$$\varepsilon_1 := a_1 n^{-\beta/(2\beta+D)}, \quad \varepsilon_2 := a_2 n^{-\alpha/(2\alpha+2D-2)}, \quad \varepsilon_3 := a_3 \max\{-\beta/(2\beta+D), n^{-\alpha/(2\alpha+2D-2)}\}, \quad (10)$$

$$\theta_2 := (2D-2)/\alpha, \quad \theta_3 := \min\{(2D-2)/\alpha, D/\beta\}, \quad (11)$$

where  $a_1, a_2, a_3$  are arbitrary positive constants.

The total network  $\dot{\Theta}$  to give  $\dot{f} := G_\eta[\Theta_3](G_\eta[\Theta_1], G_\eta[\Theta_2])$ . With the above choice of  $\varepsilon_i$  and  $\theta_i$ , the maximum numbers of layers, non-zero parameters, and maximum absolute value of parameters in are bounded by

$$\begin{aligned} |\Theta| &\leq C_L(1 + \log_2(\max\{1 + \beta, 2 + \alpha, 1 + \log_2 J\}))(1 + \max\{\beta/D, \alpha/(2D-2)\}), \\ \|\Theta\|_0 &\leq M c_1 \varepsilon_1^{-D/\beta} + M J (c_2 \varepsilon_2^{-(2D-2)/\alpha}) + M + c_\times M \varepsilon^{-\theta_3} \\ &\leq C_S M \left\{ 1 + J \max\{n^{D/(2\beta+D)}, n^{2(D-1)/(2\alpha+2D-2)}\} \right\}, \\ \|\Theta\|_\infty &\leq C_B \max\{n^{2s(2\beta+D)/\beta}, n^{2s(2\alpha+2D-2)/\alpha}\}, \end{aligned}$$

where  $s > 0$  is a positive constant depending only on  $f^*$ . The approximation error is given by

$$\begin{aligned} &\|f^* - \dot{f}\|_{L^2} \\ &\leq a'_1 M n^{-\beta/(2\beta+D)} + C_H a'_2 M (2J-1) n^{-\alpha/(2\alpha+2D-2)} + M \max\{n^{-\beta/(2\beta+D)}, n^{-\alpha/(2\alpha+2D-2)}\} \\ &\leq C_{appr} (2J+1) M \max\{n^{-\beta/(2\beta+D)}, n^{-\alpha/(2\alpha+2D-2)}\}, \end{aligned} \quad (12)$$

where  $C_{appr} > 0$  is a constant.

## B.2 Evaluate an entropy bound of the estimators by DNNs

Here, we evaluate a variance term of  $\|\hat{f}^L - f^*\|_n$  in (7) through evaluating the term

$$\left| \frac{2}{n} \sum_{i \in [n]} \xi_i (\hat{f}^L(X_i) - f(X_i)) \right|.$$

To bound the term, we employ the technique by the empirical process technique [Koltchinskii \(2006\)](#); [Giné and Nickl \(2015\)](#); [Suzuki \(2018\)](#).

We consider an expectation of the term. Let us define a subset  $\tilde{\mathcal{F}}_{NN,\delta} \subset \Xi_{NN,\eta}(S, B, L)$  by

$$\tilde{\mathcal{F}}_{NN,\delta} := \{f - \hat{f}^L : \|f - \hat{f}^L\|_n \leq \delta, f \in \Xi_{NN,\eta}(S, B, L)\}.$$

Here, we mention that  $f \in \tilde{\mathcal{F}}_{NN,\delta}$  is bounded by providing the following lemma.

**Lemma 3.** *For any  $f \in \Xi_{NN,\eta}(S, B, L)$  with an activation function  $\eta$  satisfying Lipschitz continuity with a constant 1, we obtain*

$$\|f\|_{L^\infty} \leq B_{\mathcal{F}},$$

where  $B_{\mathcal{F}} > 0$  is a finite constant.

*Proof.* For each  $\ell \in [L]$ , consider a transformation

$$f_\ell(x) := \eta(A_\ell x + b_\ell).$$

When  $\|x\|_\infty = B_x$  and  $\|\text{vec}(A_\ell)\|_\infty, \|b_\ell\|_\infty \leq B$ , we obtain

$$\|f_\ell\|_{L^\infty} \leq \|A_\ell x + b_\ell\|_\infty \leq D_\ell B_x B + B.$$

Let  $\bar{D} := \max_{\ell \in [L]} D_\ell$ , when iteratively we have

$$\|f\|_{L^\infty} \leq \sum_{\ell \in [L] \cup \{0\}} \prod_{\ell' \in [L] \setminus \{\ell\}} (\bar{D}B)^{\ell'} < \infty,$$

by applying that  $\|x\|_\infty \leq 1$  for an input.  $\square$

Due to Lemma 3 with given  $\{X_i\}_{i \in [n]}$ , we can apply the chaining (Theorem 2.3.6 in Giné and Nickl (2015)) and obtain

$$2\mathbb{E}_\xi \left[ \sup_{f' \in \tilde{F}_{NN,\delta}} \left| \frac{1}{n} \sum_{i \in [n]} \xi_i f'(X_i) \right| \right] \leq 8\sqrt{2} \frac{\sigma}{n^{1/2}} \int_0^{\delta/2} \sqrt{\log 2\mathcal{N}(\epsilon', \Xi_{NN,\eta}(S, B, L), \|\cdot\|_n)} d\epsilon'.$$

Here, to apply Theorem 2.3.6 in Giné and Nickl (2015), we set  $n^{-1/2} \sum_{i \in [n]} \xi_i f(X_i)$  as the stochastic process and 0 as  $X(t_0)$  in the theorem. Then, to bound the entropy term, we apply an inequality

$$\begin{aligned} \log \mathcal{N}(\epsilon, \Xi_{NN,\eta}(S, B, L), \|\cdot\|_n) &\leq \log \mathcal{N}(\epsilon, \Xi_{NN,\eta}(S, B, L), \|\cdot\|_{L^\infty}) \\ &\leq (S+1) \log \left( \frac{2(L+1)N^2}{B\epsilon} \right), \end{aligned}$$

the last inequality holds by Theorem 14.5 in Anthony and Bartlett (2009) and Lemma 12 in Schmidt-Hieber (2017), and the constant  $N$  is defined by

$$N := \prod_{\ell \in [L]} (N_\ell + 1),$$

where  $N_\ell$  be a number of nodes in the  $\ell$ -th layer, and we can obtain  $N = O((S/L)^L)$ . Then, we obtain

$$2\mathbb{E}_\xi \left[ \sup_{f' \in \tilde{F}_{NN,\delta}} \left| \frac{1}{n} \sum_{i \in [n]} \xi_i f'(X_i) \right| \right] \leq 4\sqrt{2} \frac{\sigma\sqrt{S+1}\delta}{n^{1/2}} \left( \log \frac{(L+1)N^2}{B\delta} + 1 \right). \quad (13)$$

With the bound (13) for the expectation term, we apply the Gaussian concentration inequality (Theorem 2.5.8 in Giné and Nickl (2015)) by setting  $n^{-1} \sum_{i \in [n]} \xi_i f'(X_i)$  as the stochastic process and  $\delta^2 \geq \|f\|_n^2$  be  $B^2$  (in Theorem 2.5.8, Giné and Nickl (2015)), and obtain

$$\begin{aligned} &1 - \exp(-nu^2/2\sigma^2\delta^2) \\ &\leq \Pr_\xi \left( 4 \sup_{f' \in \tilde{F}_{NN,\delta}} \left| \frac{1}{n} \sum_{i \in [n]} \xi_i f'(X_i) \right| \leq 4\mathbb{E}_\xi \left[ \sup_{f' \in \tilde{F}_{NN,\delta}} \left| \frac{1}{n} \sum_{i=1}^n \xi_i f'(X_i) \right| \right] + u \right) \\ &\leq \Pr_\xi \left( 4 \sup_{f' \in \tilde{F}_{NN,\delta}} \left| \frac{1}{n} \sum_{i \in [n]} \xi_i f'(X_i) \right| \leq 8\sqrt{2} \frac{\sigma\sqrt{S+1}\delta}{n^{1/2}} \left( \log \frac{(L+1)N^2}{B\delta} + 1 \right) + u \right), \end{aligned} \quad (14)$$

for any  $u > 0$ . Let us introduce the following notation for simplicity:

$$V_n := 8\sqrt{2} \frac{\sigma\sqrt{S+1}}{n^{1/2}}.$$

To evaluate the variance term, we reform the basic inequality (7) as

$$-\frac{2}{n} \sum_{i=1}^n \xi_i (\hat{f}^L(X_i) - f(X_i)) + \|f^* - \hat{f}^L\|_n^2 \leq \|f^* - f\|_n^2,$$

and apply an inequality  $\frac{1}{2} \|\hat{f}^L - f\|_n^2 \leq \|f - f^*\|_n^2 + \|f^* - \hat{f}^L\|_n^2$ , then we have

$$-\frac{2}{n} \sum_{i=1}^n \xi_i (\hat{f}^L(X_i) - f(X_i)) + \frac{1}{2} \|\hat{f}^L - f\|_n^2 - \|f - f^*\|_n^2 \leq \|f^* - f\|_n^2,$$

then we have

$$-\frac{2}{n} \sum_{i=1}^n \xi_i(\hat{f}^L(X_i) - f(X_i)) + \frac{1}{2} \|\hat{f}^L - f\|_n^2 \leq 2\|f^* - f\|_n^2. \quad (16)$$

Consider a lower bound for  $-\frac{2}{n} \sum_{i \in [n]} \xi_i(\hat{f}^L(X_i) - f(X_i))$ . To make the bound (15) be valid for all  $f \in \Xi_{NN,\eta}(S, B, L)$ , we let  $\delta = \max\{\|\hat{f}^L - f\|_n, V_n\}$ . Then, we obtain the bound

$$\begin{aligned} & \left| \frac{2}{n} \sum_{i \in [n]} \xi_i(\hat{f}^L(X_i) - f(X_i)) \right| \\ & \leq \max\{\|\hat{f}^L - f\|_n, V_n\} \left\{ V_n \left( \log \frac{(L+1)N^2}{BV_n} + 1 \right) \right\} + u \\ & \leq \frac{1}{4} \left( \max\{\|\hat{f}^L - f\|_n, V_n\} \right)^2 + 2 \left\{ V_n \left( \log \frac{(L+1)N^2}{BV_n} + 1 \right) \right\}^2 + u, \end{aligned}$$

by using  $xy \leq \frac{1}{4}x^2 + 2y^2$ . Using this result to (16), we obtain

$$\begin{aligned} & -\frac{1}{4} \left( \max\{\|\hat{f}^L - f\|_n, V_n\} \right)^2 - 2 \left\{ V_n \left( \log \frac{(L+1)N^2}{BV_n} + 1 \right) \right\}^2 - u + \frac{1}{2} \|\hat{f}^L - f\|_n^2 \\ & \leq 2\|f^* - f\|_n^2. \end{aligned}$$

If  $\|\hat{f}^L - f\|_n \geq V_n$  holds, we obtain

$$-\frac{1}{4} \|\hat{f}^L - f\|_n^2 - 2 \left\{ V_n \left( \log \frac{(L+1)N^2}{BV_n} + 1 \right) \right\}^2 - u + \frac{1}{2} \|\hat{f}^L - f\|_n^2 \leq 2\|f^* - f\|_n^2.$$

Then, simple calculation yields

$$\|\hat{f}^L - f\|_n^2 \leq 4 \left\{ V_n \left( \log \frac{(L+1)N^2}{BV_n} + 1 \right) \right\}^2 + 2u + 4\|f^* - f\|_n^2. \quad (17)$$

If  $\|\hat{f}^L - f\|_n \leq V_n$ , the same result holds.

We additionally apply an inequality  $\frac{1}{2} \|\hat{f}^L - f^*\|_{L^2}^2 \leq \|f^* - f\|_n^2 + \|\hat{f}^L - f\|_n^2$  to (17), we obtain

$$\|\hat{f}^L - f^*\|_n^2 \leq 10\|f^* - f\|_n^2 + 8 \left\{ V_n \left( \log \frac{(L+1)N^2}{BV_n} + 1 \right) \right\}^2 + 4u, \quad (18)$$

with probability at least  $1 - \exp(-nu^2/2\sigma^2\delta^2)$  for all  $u > 0$ .

### B.3 Combine the results

We combine the results in Sections B.1 and B.2 and evaluate  $\|\hat{f}^L - f^*\|_{L^2(P_X)}$ . We apply the inequality (I) in the proof of Lemma 10 of Schmidt-Hieber (2017), we obtain

$$\|\hat{f}^L - f^*\|_{L^2(P_X)}^2 \leq (1 + \varepsilon)^2 \left\{ \mathbb{E}_X \left[ \|\hat{f}^L - f^*\|_n^2 \right] + (1 + \varepsilon) \frac{T^2}{n\varepsilon} (8 \log \mathcal{N}(\delta, \Xi_{NN,\eta}(S, B, L), \|\cdot\|_\infty) + 18) + 19\delta T \right\},$$

for all  $\varepsilon, \delta \in (0, 1)$ . Combining the basis inequality (7), the entropy bound (18), and Lemma 12 in Schmidt-Hieber (2017), we obtain

$$\begin{aligned} \|\hat{f}^L - f^*\|_{L^2(P_X)}^2 & \leq 3 \left\{ 10 \mathbb{E}_X \left[ \|\hat{f} - f^*\|_n^2 \right] + 8 \left\{ V_n \left( \log \frac{(L+1)N^2}{BV_n} + 1 \right) \right\}^2 + 4u \right. \\ & \quad \left. + \frac{3T^2}{n} \left( 8(S+1) \log \left( \frac{2n(L+1)N^2}{B} \right) + 18 \right) + \frac{19T}{n} \right\}, \end{aligned}$$

by setting  $\varepsilon = 0.5$  and  $\delta = 1/n$ .

About the first term of the RHS, we have

$$\mathbb{E}_X \left[ \|\dot{f} - f^*\|_n^2 \right] = \int_{[0,1]^D} (\dot{f} - f^*)^2 dP_X = \int_{[0,1]^D} (\dot{f} - f^*)^2 d\lambda \frac{dP_X}{d\lambda} \leq \|\dot{f} - f^*\|_{L^2}^2 \sup_{x \in [0,1]^D} p_X(x) \quad (19)$$

by the Hölder's inequality. Here,  $p_X$  is a density of  $P_X$  and  $\sup_{x \in [0,1]^D} p_X(x) \leq B_P$  is finite by the assumption. Also, it follows from Bernstein's inequality that for any  $u > 0$

$$\Pr \left( \|\dot{f} - f^*\|_n^2 \leq \|\dot{f} - f^*\|_{L^2(P_X)}^2 + u \right) \geq 1 - \exp \left( -\frac{nu^2}{A^2 s_n + Au} \right), \quad (20)$$

where  $A$  is a constant with  $\|\dot{f}\|_\infty \leq A$  and  $\|f^*\|_\infty \leq A$ , and  $s_n = \mathbb{E}|\dot{f}(X) - f^*(X)|^2$ .

In (18), by the choice  $f = \dot{f}$ , we see that  $\delta^2 \leq C \max\{n^{-2\beta/(2\beta+D)}, n^{-2\alpha/(2\alpha+2D-2)}\}$  with some constant  $C > 0$ , and thus  $\exp(-nu^2/(2\sigma^2\delta^2))$  converges to zero for  $u = C_u/n$  with a constant  $C_u > 0$ . Additionally, in (20), since  $s_n \leq C \max\{n^{-2\beta/(2\beta+D)}, n^{-2\alpha/(2\alpha+2D-2)}\}$  with some constant  $C > 0$ , for  $u = C_u/n$ , we have  $\exp(-nu^2/(A^2 s_n + Au))$  goes to zero. It follows then

$$\begin{aligned} & \|\hat{f}^L - f^*\|_{L^2(P_X)}^2 \\ & \leq 30B_P \|\dot{f} - f^*\|_{L^2}^2 + 24 \left\{ V_n \left( \log \frac{(L+1)N^2}{BV_n} + 1 \right) \right\}^2 + 12u \\ & \quad + \frac{9T^2}{n} \left( 8(S+1) \log \left( \frac{2n(L+1)N^2}{B} \right) + 18 \right) + \frac{27T}{n} \\ & \leq C_a^2 (2J+1)^2 M^2 \max\{n^{-2\beta/(2\beta+D)}, n^{-2\alpha/(2\alpha+2D-2)}\} \\ & \quad + \frac{S+1}{n} \left\{ 128\sigma^2 \left( \log \frac{(L+1)N^2}{BV_n} + 1 \right)^2 + 72T^2 \log \left( \frac{2n(L+1)N^2}{B} \right) \right\} + \frac{12C_u + 27T + 182T^2}{n}, \end{aligned}$$

with probability converging to one, where  $C_a, C_b > 0$  is a constant. Using the bound of the number of non-zero parameters  $S \leq C_S M \left\{ 1 + J \max\{n^{D/(2\beta+D)}, n^{2(D-1)/(2\alpha+2D-2)}\} \right\}$ , we obtain

$$\begin{aligned} & \|\hat{f}^L - f^*\|_{L^2(P_X)}^2 \\ & \leq \left\{ C_a^2 (2J+1)^2 M^2 + 1024\sigma^2 C_S M (1+J) \left( \log \frac{(L+1)N^2}{BV_n} + 1 \right)^2 + 72T^2 \log \left( \frac{2n(L+1)N^2}{B} \right) \right\} \\ & \quad \times \max\{n^{-2\beta/(2\beta+D)}, n^{-\alpha/(\alpha+D-1)}\} + \frac{1024\sigma^2 + 12C_u + 27T + 182T^2}{n}. \end{aligned}$$

Since  $V_n, V, L, B, N$  are polynomial to  $n$ , this completes the proof of Theorem 1.  $\square$

## C Proof of Theorem 2

We follow a technique developed by van der Vaart and van Zanten (2011) and evaluate contraction of the posterior distribution, and show that

$$\begin{aligned} & \mathbb{E}_{f^*} \left[ \mathbb{P}_f \left( f : \|f - f^*\|_{L^2(P_X)}^2 \geq r C_B \max\{n^{-2\beta/(2\beta+D)}, n^{-\alpha/(\alpha+D-1)}\} (\log n)^2 | \mathcal{D}_n \right) \right] \\ & \leq \exp \left( -r^2 c_2 \max\{n^{D/(2\beta+D)}, n^{(D-1)/(\alpha+D-1)}\} \right), \end{aligned} \quad (21)$$

for all  $r > 0$ . By the contraction, we can immediately obtain the statement of Theorem 2. To this end, we consider the following two steps. At the first step, we consider a bound for the distribution with an empirical norm  $\|\cdot\|_n$ . Secondly, we derive a bound with an expectation with respect to the  $L^2(P_X)$  norm.

In this section, we reuse  $\dot{f} \in \Xi_{NN,\eta}(S, B, L)$  by the neural network  $\dot{\Theta}$  which is defined in Section B.1. By employing  $\dot{f}$ , we can use the bounds for an approximation error  $\|f^* - \dot{f}\|_{L^2}$ , a number of layers in  $\Theta$ , and a number of non-zero parameters  $\|\dot{\Theta}\|_0$ .



## C.1 Bound with an empirical norm

### Step 1. Preparation

To evaluate the convergence, we provide some notions for preparation.

We use addition notation for the dataset  $Y_{1:n} := (Y_1, \dots, Y_n)$  and  $X_{1:n} := (X_1, \dots, X_n)$  and a probability distribution of  $Y_{1:n}$  given  $X_{1:n}$  such as

$$P_{n,f} = \prod_{i \in [n]} \mathcal{N}(f(X_i), \sigma^2),$$

with some function  $f$ . Let  $p_{n,f}$  be a density function of  $P_{n,f}$ .

Firstly, we provide an event which characterizes a distribution of a likelihood ratio. We apply Lemma 14 in [van der Vaart and van Zanten \(2011\)](#) we obtain that

$$P_{n,f^*} \left( \int \frac{p_{n,f}(Y_{1:n})}{p_{n,f^*}(Y_{1:n})} d\Pi_f(f) \geq \exp(-r^2) \Pi_f(f : \|f - f^*\|_n < r) \right) \geq 1 - \exp(-nr^2/8),$$

for any  $f$  and  $r > 0$ . To employ the entropy bound, we will update  $\Pi_f(f : \|f - f^*\|_n < r)$  of this bound as  $\Pi_f(f : \|f - \dot{f}\|_{L^\infty} < r)$ . To this end, we apply Lemma [4](#) then it yields the following bound such for  $\|f - f^*\|_n$  as

$$1 - \exp(-nr^2/B_f^2) \leq \Pr_X \left( \|f - f^*\|_n \leq \|f - \dot{f}\|_{L^\infty} + B_p \|\dot{f} - f^*\|_{L^2} + r \right),$$

for any  $r$  and a parameter  $B_f > 0$ . Using the inequality [\(12\)](#) for  $\|\dot{f} - f^*\|_{L^2}$ , we define  $\epsilon_n$  as

$$\epsilon_n \geq \|\dot{f} - f^*\|_{L^2},$$

and also substitute  $r = B_p \epsilon_n$ , then we have

$$1 - \exp(-nB_p^2 \epsilon_n^2 / B_f^2) \leq \Pr_X \left( \|f - f^*\|_n \leq \|f - \dot{f}\|_{L^\infty} + 2B_p \epsilon_n \right).$$

Then, we consider an event  $\mathcal{E}_r$  as follows and obtain that

$$\begin{aligned} P_{n,f^*}(\mathcal{E}_r) &:= P_{n,f^*} \left( \int \frac{p_{n,f}(Y_{1:n})}{p_{n,f^*}(Y_{1:n})} d\Pi_f(f) \geq \exp(-r^2) \Pi_f(f : \|f - \dot{f}\|_{L^\infty} < B_p \epsilon_n) \right) \\ &\geq 1 - \exp(-n9B_p^2 \epsilon_n^2 / 8) - \exp(-nB_p^2 \epsilon_n^2 / B_f^2), \end{aligned} \quad (22)$$

by substituting  $r = 3B_p \epsilon_n$ .

Secondly, we provide a test function  $\phi : Y_{1:n} \mapsto z \in \mathbb{R}$  which can identify the distribution with  $f^*$  asymptotically. Let  $\mathbb{E}_{n,f}[\cdot]$  be an expectation with respect to  $P_{n,f}$ . By Lemma 13 in [van der Vaart and van Zanten \(2011\)](#), there exists a test  $\phi$  satisfying

$$\mathbb{E}_{n,f^*}[\phi_r] \leq 9\mathcal{N}(r/2, \Xi_{NN,\eta}(S, B, L), \|\cdot\|_n) \exp(-r^2/8),$$

and

$$\sup_{f \in \Xi_{NN,\eta}(S, B, L) : \|f - f^*\|_n \geq r} \mathbb{E}_{n,f}[1 - \phi_r] \leq \exp(-r^2/8),$$

for any  $r > 0$  and  $j \in \mathbb{N}$ . By the entropy bound for  $\mathcal{N}(r, \Xi_{NN,\eta}(S, B, L), \|\cdot\|_n) \leq \mathcal{N}(r, \Xi_{NN,\eta}(S, B, L), \|\cdot\|_{L^\infty})$ , we have

$$\mathbb{E}_{n,f^*}[\phi_r] \leq r^{-1} 18(L+1)N^2 \exp(-r^2/8 + S + 1).$$

### Step 2. Bound an error with fixed design.

To evaluate contraction of the posterior distribution, we decompose the expected posterior distribution as

$$\mathbb{E}_{f^*} [\Pi_f(f : \|f - f^*\|_n \geq 4\epsilon_r | \mathcal{D}_n)]$$

$$\begin{aligned} &\leq \mathbb{E}_{f^*} [\phi_r] + \mathbb{E}_{f^*} [\mathcal{E}_r^c] + \mathbb{E}_{f^*} [\Pi_f(f : \|f - f^*\|_n > 4\epsilon r | \mathcal{D}_n)(1 - \phi_r) \mathbf{1}_{\mathcal{E}_r}] \\ &=: A_n + B_n + C_n. \end{aligned}$$

Here, note that a support of  $\Pi_f$  is included in  $\Xi_{NN,\eta}(S, B, L)$  due to the setting of  $\Pi$ .

About  $A_n$ , we use the bound about  $\phi_r$  substitute  $\sqrt{n}\epsilon r$  into  $r$ , then obtain

$$A_n \leq 18(\sqrt{n}\epsilon r)^{-1}(L+1)N^2 \exp(-n\epsilon^2 r^2/8 + S+1).$$

About  $B_n$ , by using the result of  $\mathcal{E}_r$  as (22) and substitute  $\sqrt{n}\epsilon r$  into  $r$ , then we have

$$B_n \leq \exp(-n9B_p^2\epsilon_n^2/8) + \exp(-nB_p^2\epsilon_n^2/B_f^2).$$

About  $C_n$ , we decompose the term as

$$\begin{aligned} C_n &= \mathbb{E}_X \left[ \mathbb{E}_{n,f^*} \left[ \frac{\int_{\Xi_{NN,\eta}(S,B,L)} \mathbf{1}_{\{\|f-f^*\|_n > 4\epsilon r\}} p_{n,f}(Y_{1:n}) d\Pi_f(f)}{\int_{\Xi_{NN,\eta}(S,B,L)} p_{n,f}(Y_{1:n}) d\Pi_f(f)} (1 - \phi_r) \mathbf{1}_{\mathcal{E}_r} \right] \right] \\ &= \mathbb{E}_X \left[ \mathbb{E}_{n,f^*} \left[ \frac{\int_{\mathcal{F}} \mathbf{1}_{\{\|f-f^*\|_n > 4\epsilon r\}} \frac{p_{n,f}(Y_{1:n})}{p_{n,f^*}(Y_{1:n})} d\Pi_f(f)}{\int_{\mathcal{F}} \frac{p_{n,f}(Y_{1:n})}{p_{n,f^*}(Y_{1:n})} d\Pi_f(f)} (1 - \phi_r) \mathbf{1}_{\mathcal{E}_r} \right] \right] \\ &\leq \mathbb{E}_X \left[ \mathbb{E}_{n,f^*} \left[ \int_{f \in \Xi_{NN,\eta}(S,B,L) : \|f-f^*\|_n > \sqrt{2}\epsilon r} \frac{p_{n,f}(Y_{a:n})}{p_{n,f^*}(Y_{1:n})} d\Pi_f(f) \right. \right. \\ &\quad \left. \left. \times \exp(n\epsilon^2 r^2) \Pi_f(f : \|f - \dot{f}\|_{L^\infty} < B_p \epsilon_n)^{-1} (1 - \phi_r) \mathbf{1}_{\mathcal{E}_r} \right] \right] \\ &= \mathbb{E}_X \left[ \mathbb{E}_{n,f^*} \left[ \int_{f \in \Xi_{NN,\eta}(S,B,L) : \|f-f^*\|_n > \sqrt{2}\epsilon r} \frac{p_{n,f}(Y_{a:n})}{p_{n,f^*}(Y_{1:n})} d\Pi_f(f) \right. \right. \\ &\quad \left. \left. \times \exp(n\epsilon^2 r^2 - \log \Pi_f(f : \|f - \dot{f}\|_{L^\infty} < B_p \epsilon_n)) (1 - \phi_r) \mathbf{1}_{\mathcal{E}_r} \right] \right] \end{aligned}$$

by the definition of  $\mathcal{E}_r$ . Here, we evaluate  $-\log \Pi_f(f : \|f - \dot{f}\|_{L^\infty} < B_p \epsilon_n)$  as

$$-\log \Pi_f(f : \|f - \dot{f}\|_{L^\infty} < B_p \epsilon_n) \leq -\log \Pi_\Theta(\Theta : \|\Theta - \dot{\Theta}\|_\infty < L_f B_p \epsilon_n) \leq S \log((B_f L_f \epsilon_n)^{-1}),$$

where  $\dot{\Theta}$  is the parameter which constitute  $\dot{f}$  and  $L_f$  is a Lipschitz constant of  $G_\eta[\cdot]$ . Thus, the bound for  $C_n$  is rewritten as

$$\begin{aligned} C_n &\leq \mathbb{E}_X \left[ \int_{f \in \Xi_{NN,\eta}(S,B,L) : \|f-f^*\|_n > \sqrt{2}\epsilon r} \frac{p_{n,f}(Y_{1:n})}{p_{n,f^*}(Y_{1:n})} \mathbb{E}_{n,f} [(1 - \phi_r) \mathbf{1}_{\mathcal{E}_r}] d\Pi_f(f) \right. \\ &\quad \left. \times \exp(n\epsilon^2 r^2 + S \log((B_f L_f \epsilon_n)^{-1})) \right] \\ &\leq \exp \left( n\epsilon^2 r^2 + S \log((B_f L_f \epsilon_n)^{-1}) - \frac{r'^2}{8} \right), \end{aligned}$$

here, we introduce  $r'$  is a  $r$  for defining  $\phi_r$  to identify  $r$  for  $\mathcal{E}_r$ . Here, we substitute  $r' = 4\sqrt{n}\epsilon r$ , then we have

$$C_n \leq \exp(S \log((B_f L_f \epsilon_n)^{-1}) - 2n\epsilon^2 r^2)$$

Combining the results about  $A_n, B_n, C_n$  and  $D_n$ , we obtain

$$\begin{aligned} &\mathbb{E}_{f^*} [\Pi_f(f : \|f - f^*\|_n \geq 4\epsilon r | \mathcal{D}_n)] \\ &\leq \exp(-n\epsilon^2 r^2/8 + S + 1 + \log 18(\sqrt{n}\epsilon r)^{-1}(L+1)N^2) \end{aligned}$$

$$\begin{aligned}
 & + \exp(-n9B_p^2\epsilon_n^2/8) + \exp(-nB_p^2\epsilon_n^2/B_f^2) + \exp(S \log((B_f L_f \epsilon_n)^{-1}) - 2n\epsilon^2 r^2) \\
 \leq & 2 \exp(-\max\{9B_p^2/8, B_p^2/B_f^2\}n\epsilon_n^2) \\
 & + 2 \exp\left(2n\epsilon^2 r - 2 + C_S'' \max\{n^{-D/(2\beta+D)}, n^{-2D-2/(2\alpha+2D-2)}\} \log n + 1\right).
 \end{aligned}$$

by substituting the order of  $S$  as (11) as  $S = C_S' \max\{n^{-D/(2\beta+D)}, n^{-2D-2/(2\alpha+2D-2)}\}$  where  $C_S' = C_S M(1 + J(2^D + Q))$  and  $C_S''$  is a constant as  $C_S'' = C_S' \log \max\{-D/(2\beta + D), -2D - 2/(2\alpha + 2D - 2)\}/(B_f L_f)$ . By substituting  $r = 1$  and

$$\epsilon = \epsilon_n \log n = 2JM(2^D + Q - 1/2) \max\{n^{-\beta/(2\beta+D)}, n^{-\alpha/(\alpha+2D-2)}\} \log n,$$

then we obtain

$$\mathbb{E}_{f^*} \left[ \Pi_f \left( f : \|f - f^*\|_n \geq C_\epsilon \max\{n^{-\beta/(2\beta+D)}, n^{-\alpha/(\alpha+2D-2)}\} \log n | \mathcal{D}_n \right) \right] \rightarrow 0,$$

as  $n \rightarrow \infty$  with a constant  $C_\epsilon > 0$

## C.2 The bound with a $L^2(P_X)$ norm

We evaluate an expectation of the posterior distribution with respect to the  $\|\cdot\|_{L^2(P_X)}$  norm. The term is decomposed as

$$\begin{aligned}
 & \mathbb{E}_{f^*} \left[ \Pi_f(f : \|f - f^*\|_{L^2(P_X)} > r\epsilon | \mathcal{D}_n) \right] \\
 & \leq \mathbb{E}_{f^*} \left[ \mathbf{1}_{\mathcal{E}_r^c} \right] + \mathbb{E}_{f^*} \left[ \mathbf{1}_{\mathcal{E}_r} \Pi_f(f : 2\|f - f^*\|_n > r\epsilon | \mathcal{D}_n) \right] \\
 & \quad + \mathbb{E}_{f^*} \left[ \mathbf{1}_{\mathcal{E}_r} \Pi_f(f : 2\|f - f^*\|_{L^2(P_X)} > r\epsilon > \|f - f^*\|_n | \mathcal{D}_n) \right] \\
 & =: I_n + II_n + III_n.
 \end{aligned}$$

for all  $\epsilon > 0$  and  $r > 0$ . Since we already bound  $I_n$  and  $II_n$  in step 2, we will bound  $III_n$ .

To bound the empirical norm, we provide the following lemma.

**Lemma 4.** *Let a finite constant  $B_f > 0$  satisfy  $B_f \geq \|\dot{f} - f^*\|_{L^\infty}$ . Then, for any  $r > 0$  and  $f \in \Xi_{NN,\eta}(S, B, L)$ , we have*

$$1 - \exp(-nr^2/B_f^2) \leq \Pr_X \left( \|f - f^*\|_n \leq \|f - \dot{f}\|_{L^\infty} + B_p \|\dot{f} - f^*\|_{L^2} + r \right).$$

*Proof.* We note that the finite  $B_f$  exists. We know that  $\dot{f} \in \Xi_{NN,\eta}(S, B, L)$  is bounded by Lemma 3. Also,  $f^* \in \mathcal{F}_{M,J,\alpha,\beta}$  is bounded since it is a finite sum of continuous functions with compact supports.

We evaluate  $\|f - f^*\|_n$  as

$$\|f - f^*\|_n \leq \|f - \dot{f}\|_n + \|\dot{f} - f^*\|_n \leq \|f - \dot{f}\|_{L^\infty} + \|\dot{f} - f^*\|_n.$$

To bound the term  $\|\dot{f} - f^*\|_n$ , we apply the Hoeffding's inequality and obtain

$$1 - \exp(-2nr^2/2B_f^2) \leq \Pr_X \left( \|\dot{f} - f^*\|_n \leq \|\dot{f} - f^*\|_{L^2(P_X)} + r \right).$$

Using the inequality (19), we have

$$\Pr_X \left( \|\dot{f} - f^*\|_n \leq \|\dot{f} - f^*\|_{L^2(P_X)} + r \right) \leq \Pr_X \left( \|f - f^*\|_n \leq B_p \|\dot{f} - f^*\|_{L^2} + r \right),$$

then obtain the desired result. □

By Lemma 4, we know the bound

$$1 - \exp(-2nr^2/2B_f^2) \leq \Pr_X \left( \|f - f^*\|_n \leq \|f - f^*\|_{L^2(P_X)} + r \right),$$

for all  $f$  such as  $\|f\|_{L^\infty} \leq B$ . We set  $r' = \|f - f^*\|_{L^2(P_X)}$ , hence

$$1 - \exp\left(-\frac{n\|f - f^*\|_{L^2(P_X)}^2}{B_f^2}\right) \leq \Pr_X(\|f - f^*\|_n \leq 2\|f - f^*\|_{L^2(P_X)}).$$

Using this result, we obtain

$$\begin{aligned} III_n &\leq \mathbb{E}_X \left[ \mathbb{E}_{n,f^*} \left[ \int_{f \in \Xi_{NN,\eta}(S,B,L): \|f-f^*\|_{L^2(P_X)} > r\epsilon > 2\|f-f^*\|_n} \frac{p_{n,f}(Y_{1:n})}{p_{n,f^*}(Y_{1:n})} d\Pi_f(f) \mathbf{1}_{\mathcal{E}_r} \right] \right] \\ &\quad \times \exp\left(n\epsilon^2 r''^2 - \log \Pi_f(f : \|f - f^*\|_{L^\infty} < B_p \epsilon_n)\right) \\ &\leq \int_{f \in \Xi_{NN,\eta}(S,B,L): \|f-f^*\|_{L^2(P_X)} > r\epsilon} \Pr_X(\|f - f^*\|_{L^2(P_X)} > 2\|f - f^*\|_n) d\Pi_f(f) \\ &\quad \times \exp\left(n\epsilon^2 r^2 + S \log((B_f L_f \epsilon_n)^{-1})\right) \\ &\leq \exp\left(n\epsilon^2 r''^2 + S \log((B_f L_f \epsilon_n)^{-1}) - \frac{nr^2 \epsilon^2}{B_f^2}\right), \end{aligned}$$

where  $r''$  is a parameter for defining  $\mathcal{E}_r$ . We substitute  $r'' = r/\sqrt{2}B$ , then we have

$$III_n \leq \exp\left(S \log((B_f L_f \epsilon_n)^{-1}) - \frac{nr^2 \epsilon^2}{2B_f^2}\right)$$

Following the same discussion in Section [C.1](#), we combine the result and obtain

$$\begin{aligned} I_n + II_n + III_n &\leq 3 \exp\left(-\max\{9B_p^2/8, B_p^2/B_f^2\}n\epsilon_n^2\right) + \exp\left(S \log((B_f L_f \epsilon_n)^{-1}) - nr^2 \epsilon^2/2B_f^2\right) \\ &\quad + 3 \exp\left(2n\epsilon^2 r - 2 + C_S'' \max\{n^{-D/(2\beta+D)}, n^{-2D-2/(2\alpha+2D-2)}\} \log n + 1\right), \end{aligned}$$

and setting

$$\epsilon = \epsilon_n \log n = 2JM(2^D + Q - 1/2) \max\{n^{-\beta/(2\beta+D)}, n^{-\alpha/(\alpha+2D-2)}\} \log n,$$

yields the same results. Then, we obtain the inequality [\(21\)](#), hence we show the result.  $\square$

## D Proof of Theorem [3](#)

We discuss minimax optimality of the estimator. We apply the techniques developed by [Yang and Barron \(1999\)](#) and utilized by [Raskutti et al. \(2012\)](#).

Let  $\tilde{\mathcal{F}}_{M,J,\alpha,\beta}(\delta) \subset \mathcal{F}_{M,J,\alpha,\beta}$  be a packing set of  $\mathcal{F}_{M,J,\alpha,\beta}$  with respect to  $\|\cdot\|_{L^2}$ , namely, each pair of elements  $f, f' \in \tilde{\mathcal{F}}_{M,J,\alpha,\beta}$  satisfies  $\|f - f'\|_{L^2} \geq \delta$ . Following the discussion by [Yang and Barron \(1999\)](#), the minimax estimation error is lower bounded as

$$\min_{\tilde{\mathcal{F}}} \max_{f^* \in \mathcal{F}_{M,J,\alpha,\beta}} \Pr_{f^*} \left( \|\tilde{f} - f^*\|_{L^2(P_X)} \geq \frac{\delta_n}{2} \right) \geq \min_{\tilde{\mathcal{F}}} \max_{f^* \in \tilde{\mathcal{F}}_{M,J,\alpha,\beta}(\delta)} \Pr_{f^*} \left( \|\tilde{f} - f^*\|_{L^2(P_X)} \geq \frac{\delta_n}{2} \right).$$

Let  $\tilde{f}' := \operatorname{argmin}_{f' \in \tilde{\mathcal{F}}_{M,J,\alpha,\beta}(\delta)} \|\tilde{f} - f'\|$  be a projected estimator  $\tilde{f}$  onto  $\tilde{\mathcal{F}}_{M,J,\alpha,\beta}(\delta)$ . Then, the value is lower bounded as

$$\begin{aligned} &\min_{\tilde{\mathcal{F}}} \max_{f^* \in \tilde{\mathcal{F}}_{M,J,\alpha,\beta}(\delta)} \Pr_{f^*} \left( \|\tilde{f} - f^*\|_{L^2(P_X)} \geq \frac{\delta_n}{2} \right) \\ &\geq \min_{\tilde{\mathcal{F}}} \max_{f \in \tilde{\mathcal{F}}_{M,J,\alpha,\beta}(\delta)} \Pr_f(f \neq \tilde{f}') \end{aligned}$$

$$\geq \min_{\tilde{f}'} \Pr_{\tilde{f} \sim U}(\tilde{f}' \neq \tilde{f}),$$

where  $\tilde{f}$  is uniformly generated from  $\tilde{\mathcal{F}}_{M,J,\alpha,\beta}(\delta)$  and  $Pr_U$  denotes a probability with respect to the uniform distribution.

We apply the Fano's inequality (summarized as Theorem 2.10.1 in [Cover and Thomas \(2012\)](#)), we obtain

$$\Pr_{\tilde{f} \sim U}(\tilde{f}' \neq \tilde{f}) \geq 1 - \frac{I(F_U; D_n) + \log 2}{\log |\tilde{\mathcal{F}}_{M,J,\alpha,\beta}(\delta)|},$$

where  $I(F_U; Y_{1:n})$  is a mutual information between a uniform random variable  $F_U$  on  $\tilde{\mathcal{F}}_{M,J,\alpha,\beta}(\delta)$  and  $Y_{1:n}$ . The mutual information is evaluated as

$$\begin{aligned} I(F_U; Y_{1:n}) &= \frac{1}{|\tilde{\mathcal{F}}_{M,J,\alpha,\beta}(\delta')|} \sum_{f \in \tilde{\mathcal{F}}_{M,J,\alpha,\beta}(\delta')} \int \log \left( \frac{p_{n,f}(Y_{1:n})}{E_{F_U}[p_{n,F_U}(Y_{1:n})]} \right) dP_{n,f}(Y_{1:n}) \\ &\leq \max_{f \in \tilde{\mathcal{F}}_{M,J,\alpha,\beta}(\delta')} \int \log \left( \frac{p_{n,f}(Y_{1:n})}{E_{F_U}[p_{n,F_U}(Y_{1:n})]} \right) dP_{n,f}(Y_{1:n}) \\ &\leq \max_{f \in \tilde{\mathcal{F}}_{M,J,\alpha,\beta}(\delta')} \max_{f' \in \tilde{\mathcal{F}}_{M,J,\alpha,\beta}(\delta')} \int \log \left( \frac{p_{n,f}(Y_{1:n})}{|\tilde{\mathcal{F}}_{M,J,\alpha,\beta}(\delta')|^{-1} p_{n,f'}(Y_{1:n})} \right) dP_{n,f}(Y_{1:n}) \\ &= \max_{f, f' \in \tilde{\mathcal{F}}_{M,J,\alpha,\beta}(\delta')} \log |\tilde{\mathcal{F}}_{M,J,\alpha,\beta}(\delta')| + \int \log \left( \frac{p_{n,f}(Y_{1:n})}{p_{n,f'}(Y_{1:n})} \right) dP_{n,f}(Y_{1:n}). \end{aligned}$$

Here, we know that

$$\log |\tilde{\mathcal{F}}_{M,J,\alpha,\beta}(\delta')| \leq \log \mathcal{N}(\delta'/2, \mathcal{F}_{M,J,\alpha,\beta}, \|\cdot\|_{L^2}),$$

and

$$\int \log \left( \frac{p_{n,f}(Y_{1:n})}{p_{n,f'}(Y_{1:n})} \right) dP_{n,f}(Y_{1:n}) \leq \frac{n}{2} \mathbb{E}_X [\|f - f'\|_n^2] \leq \frac{n}{8} \delta'^2,$$

since  $f, f' \in \tilde{\mathcal{F}}_{M,J,\alpha,\beta}(\delta')$ .

We will provide a bound for  $\log \mathcal{N}(\delta'/2, \mathcal{F}_{M,J,\alpha,\beta}, \|\cdot\|_{L^2})$ . Since  $\mathcal{F}_{M,J,\alpha,\beta}$  is a sum of  $M$  functions in  $\mathcal{F}_{1,J,\alpha,\beta}$ , we have

$$\log \mathcal{N}(\delta, \mathcal{F}_{M,J,\alpha,\beta}, \|\cdot\|_{L^2}) \leq M \log \mathcal{N}(\delta', \mathcal{F}_{1,J,\alpha,\beta}, \|\cdot\|_{L^2}).$$

To bound  $\log \mathcal{N}(\delta', \mathcal{F}_{1,J,\alpha,\beta}, \|\cdot\|_{L^2})$ , we define  $\mathcal{I}_{\alpha,J} := \{\mathbf{1}_R : I^D \rightarrow \{0,1\} | R \in \mathcal{R}_{\alpha,J}\}$ . We know that  $\mathcal{F}_{1,J,\alpha,\beta} = H^\beta(I^D) \otimes \mathcal{I}_{\alpha,J}$ , hence we obtain

$$\log \mathcal{N}(\delta', \mathcal{F}_{1,J,\alpha,\beta}, \|\cdot\|_{L^2}) \leq \log \mathcal{N}(\delta', H^\beta(I^D), \|\cdot\|_{L^2}) + \log \mathcal{N}(\delta', \mathcal{I}_{\alpha,J}, \|\cdot\|_{L^2}).$$

By the entropy bound for smooth functions (e.g. Theorem 2.7.1 in [van der Vaart and Wellner \(1996\)](#)), we use the bound

$$\log \mathcal{N}(\delta', H^\beta(I^D), \|\cdot\|_{L^2}) \leq C_H \delta'^{-D/\beta},$$

with a constant  $C_H > 0$ . Furthermore, about the covering number of  $\mathcal{I}_{\alpha,J}$ , we use the relation

$$\begin{aligned} \|\mathbf{1}_R - \mathbf{1}_{R'}\|_{L^2}^2 &= \int (\mathbf{1}_R(x) - \mathbf{1}_{R'}(x))^2 dx = \int (\mathbf{1}_R(x) - \mathbf{1}_{R'}(x)) dx \\ &= \int_{\mathbf{x} \in I^D} \mathbf{1}_R(\mathbf{x})(1 - \mathbf{1}_{R'}(\mathbf{x})) d\mathbf{x} =: d_1(R, R'), \end{aligned}$$

where  $R, R' \in \mathcal{R}_{\alpha, J}$  and  $d_1$  is a difference distance with a Lebesgue measure for sets by [Dudley \(1974\)](#). By Theorem 3.1 in [Dudley \(1974\)](#), we have

$$\log \mathcal{N}(\delta', \mathcal{R}_{\alpha, J}, d_1) \leq C_\lambda \delta'^{-(D-1)/\alpha},$$

with a constant  $C_\lambda > 0$ . Then, we bound the entropy of  $\mathcal{I}_{\alpha, J}$  as

$$\log \mathcal{N}(\delta', \mathcal{I}_{\alpha, J}, \|\cdot\|_{L^2}) = \log \mathcal{N}(\delta'^2, \mathcal{R}_{\alpha, J}, d_1). \quad (23)$$

To bound the term, we provide the following Lemma.

**Lemma 5.** *We obtain*

$$\log \mathcal{N}(\delta, \mathcal{R}_{\alpha, J}, d_1) \leq J \mathcal{N}(\delta/J, \mathcal{R}_{\alpha, 1}, d_1).$$

*Proof.* Fix  $\delta > 0$  arbitrary. Let  $\tilde{\mathcal{R}} \subset \mathcal{R}_{\alpha, 1}$  be a centers of the  $\delta$ -covering balls, and  $|\tilde{\mathcal{R}}| = \bar{R}$ . Also define that  $\tilde{\mathcal{R}}^J := \{\cap_{j \in [J]} R_j \mid R_j \in \tilde{\mathcal{R}}\}$ . Obviously, we have  $\tilde{\mathcal{R}}^J \subset \mathcal{R}_{\alpha, J}$  and  $|\tilde{\mathcal{R}}^J| = \bar{R}^J$ .

Consider  $R \in \mathcal{R}_{\alpha, J}$ . By its definition, there exist  $\tilde{R}_1, \dots, \tilde{R}_J \in \mathcal{R}_{\alpha, 1}$  and satisfy  $R = \cap_{j \in [J]} \tilde{R}_j$ . Since  $\tilde{\mathcal{R}}$  is a set of centers of the covering balls, there exist  $\dot{R}_1, \dots, \dot{R}_J \in \tilde{\mathcal{R}}$  and  $d_1(\dot{R}_j, \tilde{R}_j) \leq \delta$  holds.

Here, we define  $\dot{R} \in \tilde{\mathcal{R}}^J$  as  $\dot{R} = \cap_{j \in [J]} \dot{R}_j$ . Now, we have

$$d_1(\dot{R}, R) \leq \sum_{j \in [J]} d_1(\dot{R}_j, \tilde{R}_j) \leq J\delta.$$

Hence, for arbitrary  $R \in \mathcal{R}_{\alpha, J}$ , there exists  $\dot{R}$  in  $\tilde{\mathcal{R}}^J$  and their distance is bounded by  $J\delta$ . Now, we can say that  $\tilde{\mathcal{R}}^J$  is a set of centers for covering balls for  $\mathcal{R}_{\alpha, J}$  with radius  $J\delta$ . Since  $|\tilde{\mathcal{R}}^J| = \bar{R}^J$ , the statement holds.  $\square$

Applying Lemma [5](#), we obtain

$$\log \mathcal{N}(\delta'^2, \mathcal{R}_{\alpha, J}, d_1) \leq C_\lambda J^{(\alpha+D-1)/\alpha} \delta'^{-2(D-1)/\alpha}.$$

Substituting the results yields

$$\log \mathcal{N}(\delta'/2, \mathcal{F}_{M, J, \alpha, \beta}, \|\cdot\|_{L^2}) \leq MC_H \delta'^{-D/\beta} + MC_\lambda \delta'^{-2(D-1)/\alpha}.$$

We provide a lower bound for  $\log |\tilde{\mathcal{F}}_{M, J, \alpha, \beta}(\delta)|$ . Let  $D(\delta, \mathcal{F}_{M, J, \alpha, \beta}, \|\cdot\|_{L^2})$  be a notation for a packing number  $|\tilde{\mathcal{F}}_{M, J, \alpha, \beta}(\delta)|$ . Now, we have

$$\begin{aligned} \log D(\delta, \mathcal{F}_{M, J, \alpha, \beta}, \|\cdot\|_{L^2}) &\geq \log D(\delta, \mathcal{F}_{1, J, \alpha, \beta}, \|\cdot\|_{L^2}) \\ &\geq \max\{\log D(\delta, H^\beta(I^D), \|\cdot\|_{L^2}), \log D(\delta, \mathcal{I}_{\alpha, J}, \|\cdot\|_{L^2})\}. \end{aligned}$$

Similar to [\(23\)](#),

$$\log D(\delta, \mathcal{I}_{\alpha, J}, \|\cdot\|_{L^2}) = \log D(\delta^2, \mathcal{R}_{\alpha, J}, d_1) \geq \log D(\delta^2, \mathcal{R}_{\alpha, 1}, d_1).$$

About  $\log D(\delta, H^\beta(I^D), \|\cdot\|_{L^2})$ , we apply Lemma 3.5 in [Dudley \(1974\)](#) then

$$\log D(\delta, H^\beta(I^D), \|\cdot\|_{L^2}) \geq \log \mathcal{N}(\delta, H^\beta(I^D), \|\cdot\|_{L^2}) \geq c_{lh} \delta^{-D/\beta},$$

with some constant  $c_{lh} > 0$ . About  $\log D(\delta^2, \mathcal{R}_{\alpha, 1}, d_1)$ , since the definition of  $\mathcal{R}_{\alpha, 1}$  follows the boundary fragmented class by restricting sets as a image of smooth embeddings, we apply Theorem 3.1 in [Dudley \(1974\)](#) and obtain

$$\log D(\delta^2, \mathcal{R}_{\alpha, 1}, d_1) \geq \log \mathcal{N}(\delta^2, \mathcal{R}_{\alpha, 1}, d_1) \geq c_{lr} \delta^{-2(D-1)/\alpha},$$

with some constant  $c_{lr} > 0$ .

Then, we provide a lower bound of  $\Pr_{\check{f} \sim U}(\bar{f}' \neq \check{f})$  as

$$\Pr_{\check{f} \sim U}(\bar{f}' \neq \check{f}) \geq 1 - \frac{C_H M \delta'^{-D/\beta} + C_\lambda M \delta'^{-2(D-1)/\alpha} + \frac{n}{2} \delta^2 + \log 2}{\max\{c_{lh} \delta^{-D/\beta}, c_{lr} \delta^{-2(D-1)/\alpha}\}}.$$

By selecting  $\delta$  and  $\delta'$  as having an order  $\max\{n^{-2\beta/(2\beta+D)}, n^{-\alpha/(\alpha+2D-2)}\}$  and satisfying

$$1 - \frac{C_H M \delta'^{-D/\beta} + C_\lambda M \delta'^{-2(D-1)/\alpha} + \frac{n}{2} \delta^2 + \log 2}{\max\{c_{lh} \delta^{-D/\beta}, c_{lr} \delta^{-2(D-1)/\alpha}\}} \geq \frac{1}{2}.$$

Then, we finally obtain the statement of Theorem [3](#).

## E Proof of Corollary [4](#)

Let us introduce a specific form of a piecewise smooth function  $\bar{f} : \mathbb{R}^D \rightarrow \mathbb{R}$  as

$$\bar{f}(x) := f_0(x) \otimes \mathbf{1}_{x_1 \geq g_1(x_{-1})}(x) + f_1(x) \mathbf{1}_{x_1 \geq g_2(x_{-1})}(x),$$

where  $f_0, f_1 \in H^\beta(I^D)$  such that  $\sup_{x \in I^D} f_0(x) < \inf_{x \in I^D} f_1(x)$  and  $g_1, g_2 \in H^\alpha(I^D)$ . According to Corollary 6.4.2 in [Korostelev and Tsybakov \(2012\)](#), all linear estimators [\(4\)](#) do not attain the minimax optimal rate for estimating function with a form of  $f$ . Then, combining the results in Theorem [1](#), [2](#) and [3](#), the statement holds.

## F Specific Examples of Other Inefficient Methods

Orthogonal series methods estimate functions using an orthonormal basis. It is one of the most fundamental methods for nonparametric regression (For an introduction, see Section 1.7 in [Tsybakov \(2009\)](#)). Let  $\phi_j(x)$  for  $j \in \mathbb{N}$  be an orthonormal basis function in  $L^2(P_X)$ . An estimator for  $f^*$  by the orthogonal series method is defined as

$$\hat{f}^S(x) := \sum_{j \in [J]} \hat{\gamma}_j \phi_j(x),$$

where  $J \in \mathbb{N}$  is a hyper-parameter and  $\hat{\gamma}_j$  is a coefficient calculated as  $\hat{\gamma}_j := \frac{1}{n} \sum_{i \in [n]} Y_i \phi_j(X_i)$ . When the true function is smooth, i.e.  $f^* \in H^\beta$ ,  $\hat{f}^S$  is known to be optimal in the minimax sense [Tsybakov \(2009\)](#). About estimation for  $f^* \in \mathcal{F}_{M,J,\alpha,\beta}$ , we can obtain the following proposition.

**Proposition 2.** *Fix  $D \in \mathbb{N} \setminus \{1\}$ ,  $M, J \in \mathbb{N}$ ,  $\alpha > 2$  and  $\beta > 1$  arbitrary. Let  $\hat{f}^S$  be the estimator by the orthogonal series method. Suppose  $\phi_j, j \in \mathbb{N}$  are the trigonometric basis or the Fourier basis. Then, with sufficient large  $n$ , there exist  $f^* \in \mathcal{F}_{M,J,\alpha,\beta}$ ,  $P_X$ , a constant  $C_F > 0$ , and a parameter*

$$-\kappa > \max\{-2\beta/(2\beta + D), -\alpha/(\alpha + D - 1)\},$$

such that

$$\mathbb{E}_{f^*} \left[ \|\hat{f}^F - f^*\|_{L^2(P_X)}^2 \right] > C_F n^{-\kappa}.$$

*Proof.* We will specify  $f^* \in \mathcal{F}_{M,J,\alpha,\beta}$  and distribution of  $X$ , and derive an rate of convergence by the estimator by the Fourier method.

For preparation, we consider  $D = 1$  case. Let  $X$  be generated by a distribution which realize a specific case  $X_i = i/n$ . Also, we specify  $f^* \in \mathcal{F}_{M,J,\alpha,\beta}$  as

$$f^*(x) = \mathbf{1}_{\{x_1 \geq 0.5\}},$$

with  $x = (x_1, x_2) \in I^2$ . We consider a decomposition of  $f^*$  by the trigonometric basis such as

$$\phi_j(x) = \begin{cases} 1 & \text{if } j = 0, \\ \sqrt{2} \cos(2\pi kx) & \text{if } j = 2k, \\ \sqrt{2} \sin(2\pi kx) & \text{if } j = 2k + 1, \end{cases}$$

for  $k \in \mathbb{N}$ . Then, we obtain

$$f^* = \sum_{j \in \mathbb{N} \cup \{0\}} \theta_j^* \phi_j.$$

Here,  $\theta_j^*$  is a true coefficient.

For the estimator, we review its definition as follows. The estimator is written as

$$\hat{f}^F = \sum_{j \in [J] \cup \{0\}} \hat{\theta}_j \phi_j,$$

where  $\hat{\theta}_{j_1, j_2}$  is a coefficient which is defined as

$$\hat{\theta}_j = \frac{1}{n} \sum_{i \in [n]} Y_i \phi_j(X_i).$$

Also,  $J \in \mathbb{N}$  are hyper-parameters. Since  $\phi_j$  is an orthogonal basis in  $L^2$  and the Parseval's identity, an expected loss by the estimator is decomposed as

$$\begin{aligned} \mathbb{E}_{f^*} \left[ \|\hat{f}^F - f^*\|_{L^2(P_X)}^2 \right] &= \mathbb{E}_{f^*} \left[ \sum_{j \in \mathbb{N} \cup \{0\}} (\hat{\theta}_j - \theta_j^*)^2 \right] \\ &= \mathbb{E}_{f^*} \left[ \sum_{j \in [J] \cup \{0\}} (\hat{\theta}_j - \theta_j^*)^2 + \sum_{j > J} (\theta_j^*)^2 \right] \\ &= \sum_{j \in [J] \cup \{0\}} \mathbb{E}_{f^*} \left[ (\hat{\theta}_j - \theta_j^*)^2 \right] + \sum_{j > J} (\theta_j^*)^2. \end{aligned}$$

Here, we apply Proposition 1.16 in [Tsybakov \(2009\)](#) and obtain

$$\begin{aligned} \mathbb{E}_{f^*} \left[ \|\hat{f}^F - f^*\|_{L^2(P_X)}^2 \right] &= \sum_{j \in [J] \cup \{0\}} \left( \frac{\sigma^2}{n} + \rho_j^2 \right) + \sum_{j > J} (\theta_j^*)^2 \\ &\geq \sum_{j \in [J] \cup \{0\}} \frac{\sigma^2}{n} + \sum_{j > J} (\theta_j^*)^2 \\ &= \frac{\sigma^2(J+1)}{n} + \sum_{j > J} (\theta_j^*)^2, \end{aligned}$$

where  $\rho_j := n^{-1} \sum_{i \in [n]} f(X_i) \phi_j(X_i) - \langle f, \phi_j \rangle$  is a residual.

Considering the Fourier transform of step functions, we obtain  $\theta_j^* = \frac{1 - (-1)^j}{2\pi j}$ , hence

$$\sum_{j > J} (\theta_j^*)^2 = \frac{1}{4\pi^2} \Psi(J+1) = \frac{1}{4\pi^2} \sum_{k \in \mathbb{N} \cup \{0\}} \frac{1}{(J+1+k)^2} \geq \frac{1}{4\pi^2(J+1)^2},$$

where  $\Psi$  is the digamma function.

Combining the results, we obtain

$$\mathbb{E}_{f^*} \left[ \|\hat{f}^F - f^*\|_{L^2(P_X)}^2 \right] \geq \frac{\sigma^2 J + 1}{n} + \frac{1}{4\pi^2(J+1)^2}.$$

We set  $J = \lfloor c_J n^{1/3} - 1 \rfloor$  with a constant  $c_J > 0$ , then we finally obtain

$$\mathbb{E}_{f^*} \left[ \|\hat{f}^F - f^*\|_{L^2(P_X)}^2 \right] \geq n^{-2/3} \left( \sigma^2 + \frac{1}{4\pi^2} \right).$$



Then, we obtain the lower bound for the  $D = 1$  case.

For general  $D \in \mathbb{N}$ , we set a true function as

$$f^* = \bigotimes_{d \in [D]} \mathbf{1}_{\{\cdot \geq 0.5\}}.$$

Due to the tensor structure, we obtain the decomposed form

$$f^* = \sum_{j_1 \in \mathbb{N} \cup \{0\}} \cdots \sum_{j_D \in \mathbb{N} \cup \{0\}} \gamma_{j_1, \dots, j_D} \bigotimes_{d \in [D]} \phi_{j_d},$$

where  $\gamma_{j_1, \dots, j_D}$  is a coefficient such as

$$\gamma_{j_1, \dots, j_D} = \prod_{d \in [D]} \theta_{j_d},$$

using  $\theta_{j_d}$  in the preceding part. Following the same discussion, we obtain the following lower bound as

$$\mathbb{E}_{f^*} \left[ \|\hat{f}^F - f^*\|_{L^2(P_X)}^2 \right] \geq \frac{\sigma^2 (J+1)^D}{n} + D \sum_{j > J} (\theta_j^*)^2.$$

Then, we set  $J - 1 = \lfloor n^{1/(2+D)} \rfloor$ , we obtain that the bound is written as

$$\mathbb{E}_{f^*} \left[ \|\hat{f}^F - f^*\|_{L^2(P_X)}^2 \right] \geq n^{-2/(2+D)} \left( \sigma^2 + \frac{D}{2\pi^2} \right).$$

Then, we obtain the claim of the proposition for any  $D \in \mathbb{N}_{\geq 2}$ .

□

Proposition [2](#) shows that  $\hat{f}^S$  can estimate  $f^* \in \mathcal{F}_{M, J, \alpha, \beta}$  consistently since the orthogonal basis in  $L^2(P_X)$  can reveal all square integrable functions. Its order is, however, strictly worse than the optimal order. Intuitively, the method requires many basis functions to express the non-smooth structure of  $f^* \in \mathcal{F}_{M, J, \alpha, \beta}$ , and a large number of bases increases variance of the estimator, hence they lose efficiency.
